# Supplementary material for: Actin‐like 6A predicts poor prognosis of hepatocellular carcinoma and promotes metastasis and epithelial‐mesenchymal transition
Source: PubMed Central journal article supplement — Hepatology. 2016 Jan 26;63(4):1256–71. doi: 10.1002/hep.28417 (PMC4834727; doi:10.1002/hep.28417), 2016-01-26
Supplement: HEP-63-1256-s001.pdf [file HEP-63-1256-s001.pdf]

## **Supplementary Materials and Methods**

*Cell lines and cell culture.* In this study, human HCC cell lines, PLC/PRF5, Hep3B and HepG2 cells were purchased from the American Type Culture Collection (ATCC, Manassas, VA). MHCC97-L, MHCC97-H and HCCLM3 were kindly provided by the Liver Cancer Institute of Fudan University, Shanghai, China, where these cell lines were established. SMMC7721, Huh7 and immortalized human normal liver cells L02 were purchased from the Cell Bank of Typical Culture Preservation Committee of Chinese Academy of Science, Shanghai, China. Cell culture was according to the manufacturer's protocol and all the cell lines grow at 37 °C with 5% CO<sub>2</sub>. The cells' metastatic potential and features statements were according to previous studies (1-5).

*RNA extraction and semi-quantitative RT-PCR.* TRIzol<sup>®</sup> Reagent (Life Technologies, Carlsbad, CA) was used to isolate total RNA from frozen patient samples and cell lines according to the manufacturer's protocol. cDNA was synthesized using the universal cDNA synthesis kit (Toyobo, Tokyo, JP). The RNA was then reverse-transcribed to obtain cDNA by the universal cDNA synthesis kit (Toyobo, Tokyo, JP) at 37°C for 50 min. PCR products were separated by electrophoresis on 1.2% agarose gels and were visualized under ultraviolet light after ethidium bromide staining. All quantifications were normalized to the level of endogenous GAPDH as a control. The detailed procedure was according to previously described (6). The primer sequences

are listed in the Supplementary Table 4.

*Real-Time Quantitative Polymerase Chain Reaction (qRT-PCR).* The cDNA was subjected to quantitative real-time PCR (qRT-PCR) using the SYBR Green PCR Kit (Roche Life Sciences, Switzerland) and the assay was performed on an PRISM 7300 Sequence Detection System (Applied Biosystems, CA). GAPDH was used as an internal control. The relative levels of expression were quantified and analyzed. The experiments were done in triplicate. The primers were all synthesized and bought from Invitrogen Company (Shanghai, China). The primer sequences are listed in the Supplementary Table 4.

*Western Blot.* Total proteins were extracted with RIPA lysis buffer and separated by SDS-PAGE and then transferred to the PVDF membrane (Roche Life Sciences, Switzerland). The membrane were blocked with 5% skimmed milk and incubated with the appropriate antibody. The antigen-antibody complex on the membrane was detected with enhanced chemiluminescence reagents (Thermo Scientific, Waltham, MA). The antibodies are listed in the Supplementary Table 5.

*Immunohistochemistry.* Immunohistochemical staining for tissue was performed using the polymer HRP detection system (Zhongshan Goldenbridge

Biotechnology) on formalin-fixed, paraffin-embedded tissue sections that had been cut to 4- $\mu$ m thickness as described previously (7). The paraffin sections were dewaxed and antigen retrieval with 0.01 M sodium citrate buffer (pH 6.0), followed with 3 % hydrogen peroxide incubated for 20 min at room temperature to block endogenous peroxidase, next with 10 % donkey serum blocking for 30 min. Primary antibodies were incubated overnight at 4 °C in a humidified chamber, followed by HRP conjugated secondary antibody incubation for 30 minutes at room temperature. Antibody binding was detected by DAB and reaction was stopped by immersion of tissue sections in distilled water once brown color appeared. Tissue sections were counterstained by hematoxylin, dehydrated in graded ethanols and mounted. Appropriate positive and negative controls were included for each run of IHC. The antibodies were listed in the Supplementary Table 5. The immunohistochemical staining was scored according to the percentage of positively stained tumor cells, with 0 denotes less than 5% of tumor cells stained positive, 1 denotes 5 – 30%, 2 denotes 31 – 50%, 3 denotes 51 – 80% and 4 denotes >80% of tumor cells stained positive (8). The protein expression in HCC specimens was also divided into a low expression group (0 - 1) and a high expression group (2 - 4) for further analysis.

*Immunofluorescence* The tissues immunofluorescence was according to the protocol of Abcam. Immunofluorescence for cells, cells growth at glass

coverslips, and then fixed with 4% paraformaldehyde in phosphate-buffered saline (PBS) with 0.2% Trion. Cells were then blocked for an hour with 1% bovine serum albumin (BSA) followed by incubation with primary antibody overnight at 4°C. Cells were washed and incubated with appropriate secondary antibody and DAPI. The protocol of immunofluorescence for tissues were similar to IHC-P without 3 % hydrogen peroxide incubated, followed with mixed primary antibodies, next with mixed dylight-tagged secondary antibodies. The antibodies are listed in the Supplementary Table 5 and 6.

*Chromatin Immunoprecipitation (ChIP) assay.* ChIP assays were performed using the EpiQuik™ Chromatin Immunoprecipitation Kit (P-2002, Epigentek, NY) according to the manufacturer's protocol. Briefly, HCC cells were collected and fixed for 10 min at room temperature with 1% formaldehyde, followed in sequence with cell lysis and DNA shearing, Protein and DNA immunoprecipitation, cross-linked DNA reversal and DNA purification, and finally the immunoprecipitated DNA fragments were detected by real-time PCR assays using appropriate primers. All assays were repeated three times. The normal mouse IgG was used as the negative control, and anti-RNA polymerase II as the positive control. The primers were listed in the Supplementary table 7.

*Establishment of ACTL6A overexpression and knockdown cells.* ACTL6A

ectopic expression and knockdown lentivirus as well as their negative control (NC) lentivirus were purchased from GeneChem (Shanghai, China). Full-length human ACTL6A ectopic expression lentivirus was transfected into PLC/PRF5 cells, and lentiviral containing short hairpin RNAs (shRNA) targeting ACTL6A was transfected into Hep3B cells according to the manufacturer's instructions. Cells transfected with empty vector were used as controls. Puromycin (final concentration: 2 $\mu$ g/ml) was used to select stable clones. The sequences of RNAi and cDNA clone are listed in the Supplementary Table 8.

*MTT assay and colony formation assay.* To determine the level of cell proliferation, cells were seeded into each well of 96-well plates at a density of  $5 \times 10^3$  cells/well. Six wells of each group were detected every day. 100  $\mu$ l fresh medium containing MTT (Sigma, St Louis, MO) 0.5 mg/ml was put into each cell and incubated at 37°C for 4hrs, then the medium was replaced by 100  $\mu$ l of DMSO and shaken at room temperature for 10 mins. The absorbance was measured at 570 nm. For colony formation assays, cells were seeded into 35mm dishes (Corning, NY) at a density of  $5 \times 10^2$  cells/dish and cultured for 2 weeks at 37°C. The numbers of colonies per dish were counted after staining with crystal violet. All studies were conducted with 3 replicates.

*MTS assay.* Dispense  $5 \times 10^3$  per cells into wells of the 96-well plates in a final

volume of 100  $\mu$ l. Incubate the plate at 37 °C for 48–72 hours in a humidified, 5% CO<sub>2</sub> atmosphere. Add 20  $\mu$ l per well of CellTiter 96® AQueous One Solution Reagent. Incubate the plate at 37 °C for 1–4 hours in a humidified, 5% CO<sub>2</sub> atmosphere. Record the absorbance at 490nm using a 96-well plate reader. Each experiment was conducted with 3 replicates (9).

*Anchorage-independent growth assay.* Cells were seeded at  $5 \times 10^3$  cells per well in a six-well plate containing 0.3% low melting temperature soft agar (Sigma, St. Louis, MO). Cultures were fed with fresh media every 4 days. Colonies were observed under phase contrast microscope, counted and measured after 14 days (10).

*In vitro migration assay.* Cell migration was measured using a cell wound-healing assay in six-well plates in culture medium containing DMEM with 10% FBS. When cells grew to 90% confluence, they were preincubated with Mitomycin-C (10  $\mu$ g/ml) for 1h at 37 °C to suppress cell proliferation, next rinsed with phosphate-buffered saline (PBS), and then starved for 24 hours in serum-free medium. A sterile 10  $\mu$ L pipette tip was used to create three separate, parallel wounds, and migration of the cells across the wound line was assessed after 24 or 48 hours (11, 12). These experiments were performed in triplicate.

*In vitro invasion assay.* Cells in culture dish were preincubated with Mitomycin-C (10 µg/ml) for 1h at 37 °C to suppress proliferation, then  $1 \times 10^5$  cells in serum-free medium containing 0.1% bovine serum albumin were placed into the upper chamber of the insert with matrigel (BD Biosciences, MA). After 12-48 hours of incubation at 37°C, the cells remained in the upper chamber or on the upper membrane were removed. The number of cells adhering to the lower membrane of the inserts was counted after staining with a solution containing 0.1% crystal violet and 20% methanol. The numbers of cells was counted under an inverted microscope (Nikon).

*HCC mouse model.* The hepatocellular carcinoma model in nude mice was constructed as described before (13, 14). Briefly,  $5 \times 10^6$  HCCLM3 cells were injected subcutaneously into the left upper flank regions of nude mouse (3-4 weeks of age, male, BALB/c). The subcutaneous tumor size was calculated and recorded every week used vernier caliper as follows: tumor volume ( $\text{mm}^3$ ) =  $(L \times W^2)/2$ , where L = long axis and W = short axis, the measurements were repeated three times. The subcutaneous tumor tissues were removed and calculated 6 wks later. Then the subcutaneous tumor was cut into pieces of the same size as  $1 \text{ mm}^3$ , and implanted into the liver of each group respectively to mimic the primary HCC (6 in each group). After 8 wks of implantation, the mice were sacrificed, and the size for tumors was calculated and compared as mentioned above. Livers and lungs were harvested and fixed with

phosphate-buffered neutral formalin. Serial sections were subjected to histopathological analysis by hematoxylin and eosin (H&E) staining, the metastatic foci was confirmed and recorded by specialized pathologists. Then, the overall metastasis rate of tumors generated from each cell line was compared between the groups of each panel. All animal studies were conducted in the Animal Institute of CSU according to the protocols approved by the Medical Experimental Animal Care Commission of CSU.

*Statistical analysis.* Statistical analyses were performed using SPSS 17.0 for Windows (SPSS) and Graphpad Prism6. Data were expressed as the mean  $\pm$  standard error of the mean (SEM) from at least three independent experiments. Quantitative data between groups were compared using the Student *t* test. Categorical data were analyzed by the  $\chi^2$  test or Fisher exact test. Correlations between different protein expressions level were determined using Spearman's rank analysis. Overall survival and disease-free survival curves were obtained by the Kaplan-Meier method, and differences were compared by the log-rank test. Univariate analysis and multivariate analysis were analyzed with Cox proportional hazard regression model to verify the independent risk factors. A two-tailed *P* value of less than 0.05 was considered as statistical significance.

**Supplementary References :**



1. Bertran E, Crosas-Molist E, Sancho P, Caja L, Lopez-Luque J, Navarro E, et al. Overactivation of the TGF-beta pathway confers a mesenchymal-like phenotype and CXCR4-dependent migratory properties to liver tumor cells. *Hepatology*,2013,58:2032-2044.

2. Zhou Y M, Cao L, Li B, Zhang R X, Sui C J, Yin Z F, et al. Clinicopathological significance of ZEB1 protein in patients with hepatocellular carcinoma. *Ann Surg Oncol*,2012,19:1700-1706.

3. Chung K Y, Cheng I K, Ching A K, Chu J H, Lai P B, Wong N. Block of proliferation 1 (BOP1) plays an oncogenic role in hepatocellular carcinoma by promoting epithelial-to-mesenchymal transition. *Hepatology*,2011,54:307-318.

4. Tang Z Y, Ye S L, Liu Y K, Qin L X, Sun H C, Ye Q H, et al. A decade's studies on metastasis of hepatocellular carcinoma. *J Cancer Res Clin Oncol*,2004,130:187-196.

5. Tian J, Tang Z Y, Ye S L, Liu Y K, Lin Z Y, Chen J, et al. New human hepatocellular carcinoma (HCC) cell line with highly metastatic potential (MHCC97) and its expressions of the factors associated with metastasis. *Br J Cancer*,1999,81:814-821.

6. Chang R M, Yang H, Fang F, Xu J F, Yang L Y. MicroRNA-331-3p promotes proliferation and metastasis of hepatocellular carcinoma by targeting PH domain and leucine-rich repeat protein phosphatase. *Hepatology*,2014,60:1251-1263.

7. Wu F, Yang L Y, Li Y F, Ou D P, Chen D P, Fan C. Novel role for epidermal

growth factor-like domain 7 in metastasis of human hepatocellular carcinoma.

Hepatology,2009,50:1839-1850.

8. Yong K J, Gao C, Lim J S, Yan B, Yang H, Dimitrov T, et al. Oncofetal gene SALL4 in aggressive hepatocellular carcinoma. N Engl J Med,2013,368:2266-2276.

9. Wang X, Zhang C, Yan X, Lan B, Wang J, Wei C, et al. A novel bioavailable BH3 mimetic efficiently inhibits colon cancer via cascade effects of mitochondria. Clin Cancer Res,2015. pii: clincanres.0732.2015.

10. Franken N A P, Rodermond H M, Stap J, Haveman J, van Bree C. Clonogenic assay of cells in vitro. Nature Protocols,2006,1:2315-2319.

11. Pullar C E, Chen J, Isseroff R R. PP2A activation by beta2-adrenergic receptor agonists: novel regulatory mechanism of keratinocyte migration. J Biol Chem,2003,278:22555-22562.

12. Fang F, Chang R M, Yu L, Lei X, Xiao S, Yang H, et al. MicroRNA-188-5p suppresses tumor cell proliferation and metastasis by directly targeting FGF5 in hepatocellular carcinoma. J Hepatol,2015,63:874-885.

13. Yang H, Fang F, Chang R, Yang L. MicroRNA-140-5p suppresses tumor growth and metastasis by targeting transforming growth factor beta receptor 1 and fibroblast growth factor 9 in hepatocellular carcinoma. Hepatology,2013,58:205-217.

14. Lu X, Qin W, Li J, Tan N, Pan D, Zhang H, et al. The growth and metastasis of human hepatocellular carcinoma xenografts are inhibited by

small interfering RNA targeting to the subunit ATP6L of proton pump. *Cancer Res*,2005,65:6843-6849.

**Supplementary Figure legends:**

**Supplementary Figure 1. Flow chart of HCC patients enrolled in this study.**

**Supplementary figure 2. ACTL6A expression was associated with metastasis of HCC.** (A) Representative IHC images of ACTL6A protein expression in adjacent non-tumor liver tissue, no-metastasis tumor tissue and metastasis tumor tissue. Magnification of upper panel was 100x, magnification of lower panel was 400x. (B) ACTL6A expression in small HCC (SHCC), SLHCC, solitary large HCC (SLHCC) and nodular HCC (NHCC) was detected by real-time PCR, which showed NHCC had the highest ACTL6A expression.

**Supplementary figure 3. ACTL6A high expression associates with poor survival according to different clinical subtypes of HCC.** (A) Kaplan-Meier curves indicated high ACTL6A associated with shorter OS and DFS of HCC in the overall cohort. (B) Kaplan-Meier curves indicated high ACTL6A associated with shorter OS and DFS of SHCC, (C) SLHCC, and (D) NHCC patients after liver resection.

**Supplementary figure 4. ACTL6A promoted HCC cells proliferation and invasion *in vitro*.** (A) Real-time PCR and (B) western blot identified the mRNA and protein expression of ACTL6A in PLC/PRF5-ACTL6A cells, Hep3B-shACTL6A-1,-2,-3 cells and their control cells. (C) The colony formation, (D) trans-well and (E) wound-heal assays indicated ACTL6A ectopic expression promoted proliferation, migration and invasion *in vitro*, while ACTL6A knockdown had the opposite effects.

**Supplementary figure 5. ACTL6A promoted HCC growth *in vivo*.** (A) The growth curves of mouse subcutaneous transplanted tumors generated from PLC/PRF5-ACTL6A, Hep3B-shACTL6A and their control cells were detected and compared. (B) ACTL6A expression in orthotopic transplanted tumors was confirmed by IHC. Upper panel magnification: 100×, lower panel magnification: 400×.

**Supplementary figure 6. The expressions of EMT markers are determined in HCC cells.** (A) The expressions of ACTL6A, epithelial marker (E-cadherin) and mesenchymal markers (vimentin, snail) in PLC/PRF-ACTL6A and PLC/PRF5 cells were detected by real-time PCR. (B) The expressions of ACTL6A, E-cadherin, vimentin and snail were detected in Hep3B-shACTL6A and Hep3B cells.

**Supplementary figure 7. The cut-off value of DAPT treatment is determined in HCC cells.** (A) MTS assay analysis of cell relative viability of ACTL6A-interfered cells and their control cells with DMSO or different DAPT dosage treatment for 72 hours. (B) NICD1 expression levels after DMSO or different DAPT dosage treatment for 72 hours in Hep3B and PLC/PRF5-ACTL6A cells.

**Supplementary figure 8. ACTL6A promotes migration, invasion and anchor-independent growth of HCC cells through Notch signaling.** (A) Wound-heal assay analyzed the migration capacity of ACTL6A-interfered cells and their control cells with/without DAPT treatment. (B) Trans-well assay analyzed the invasion capacity of ACTL6A-interfered cells and their control cells with/without DAPT treatment. (C) Anchor-independent growth assay analyzed the migration capacity of ACTL6A-interfered cells and their control cells with/without DAPT treatment.

**Supplementary figure 9. The efficacy of SOX2 silence or ectopic expression is determined in ACTL6A-mediated HCC cells.** (A) Real-time PCR and (B) western blot confirmation of SOX2 mRNA and protein expression in SOX2 knockdown PLC/PRF5-ACTL6A cells, SOX2 ectopic expression Hep3B-shACTL6A cells and their control cells.

**Supplementary figure 10. SOX2 promotes migration and invasion of ACTL6A-interfered HCC cells.** (A) SOX2 knockdown decreased the wound-healing area and invasion cell numbers of PLC/PRF5-ACTL6A cells. (B) SOX2 ectopic expression increased the wound-healing area and invasion number of Hep3B-shACTL6A cells.

**Supplementary figure 11. The expression of ACTL6A, NICD1 and SOX2 in HCC samples.** (A) Representative IHC images showed ACTL6A, SOX2 and NICD1 were co-location in consecutive sections of HCC sample. (B) Correlation analysis revealed the positive correlation of ACTL6A, SOX2 and NICD1 expression in training and validation cohorts.

**Supplementary figure 12. ChIP-qPCR assay analysis of the direct binding of ACTL6A to the SOX2 promoter, and SOX2 to the Notch1 promoter.** (A) Positions of primers for the promoter regions of SOX2 and Notch1 are shown. (B) ChIP-qPCR assay was performed using antibody against endogenous ACTL6A or SOX2 showed ACTL6A bound to the SOX2 promoter regions (left panel); and SOX2 bound to the Notch1 promoter proximal regions (left panel).

**Supplementary figure 13. Immunohistochemistry analysis of cytokeratin 19 expression in HCC.** Representative IHC images of cytokeratin 19 negative

expression in ANLT, low and high expression in tumor tissue. Magnification of upper panel was 100x, magnification of lower panel was 400x.

145 cases of randomly selected liver tumor accepted  
hepatectomy between Jan 2006 and Dec 2009  
from Xiangya Hospital were enrolled

97 cases of randomly selected liver tumor accepted  
hepatectomy between Jan 2005 and Dec 2008  
from Affiliated Cancer Hospital were enrolled

45 excluded

27 cholangiocarcinoma  
7 liver metastases  
6 hepatic hemangioma  
5 incomplete information

34 excluded

19 cholangiocarcinoma  
5 liver metastases  
4 hepatic hemangioma  
6 incomplete information

Training cohort (n=100)

Immunohistochemistry

73casesof high  
ACTL6A expression

27 cases of low  
ACTL6A expression

Validation cohort (n=63)

Immunohistochemistry

43casesof high  
ACTL6A expression

20 cases of low  
ACTL6A expression

Correlation of ACTL6A expression with the clinicopathological  
characteristics and survival of HCC patients

Cox's proportional hazards regression model for  
univariate and multivariate analysis of risk factor

Prognostic value of ACTL6A for HCC patients



**A****ANLT****No metastasis****Metastasis**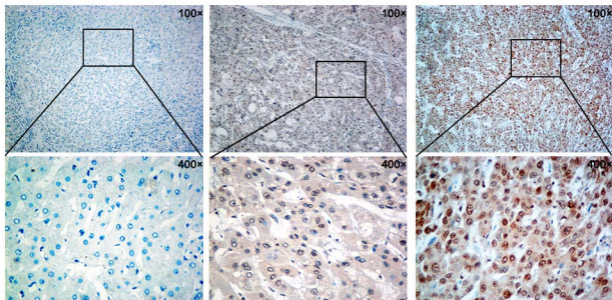**B**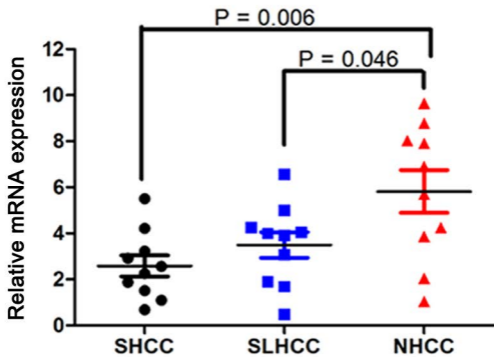

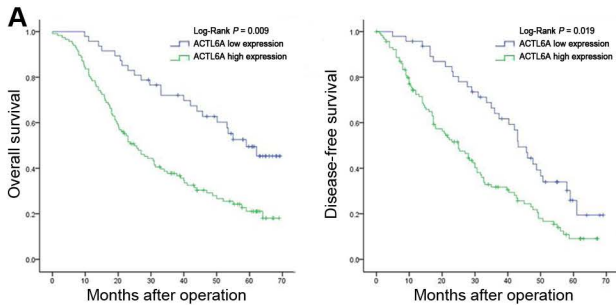

**Overall cohort**

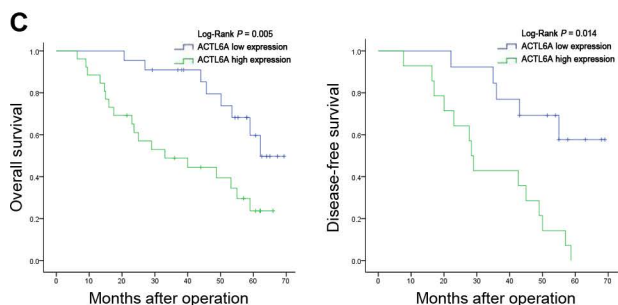

**SLHCC**

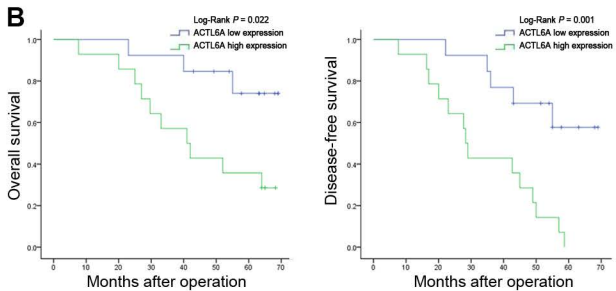

**SHCC**

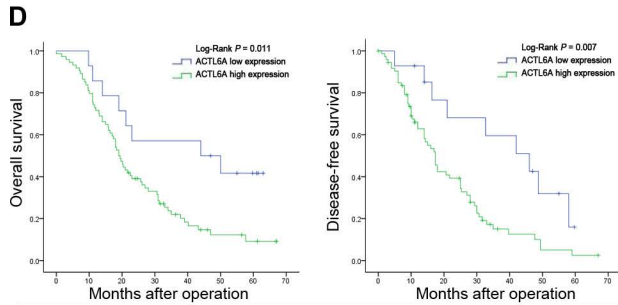

**NHCC**

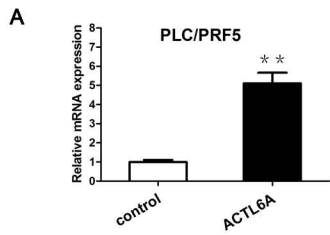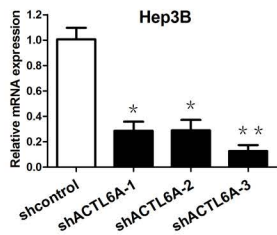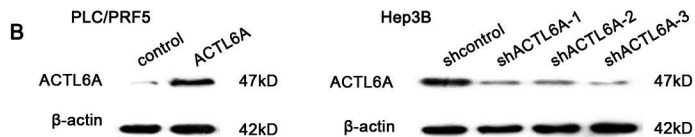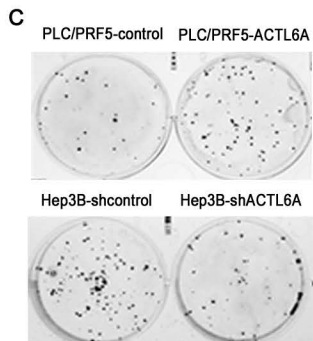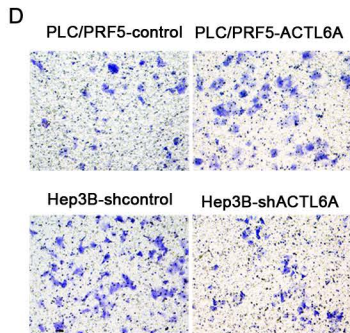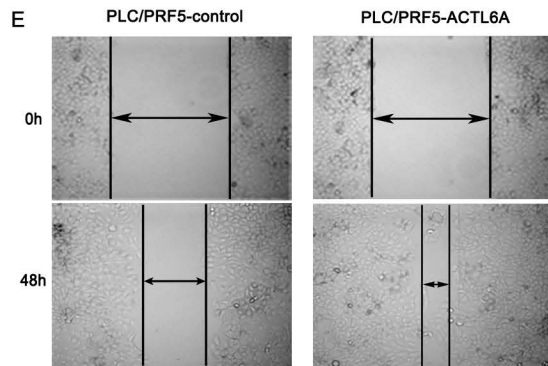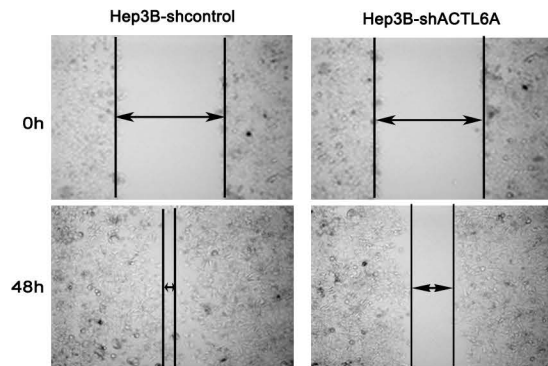

**A**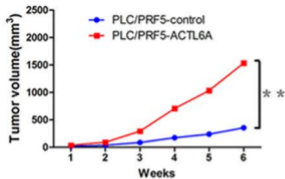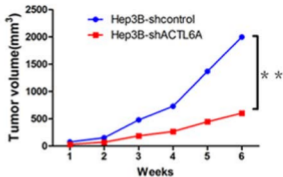**B**

PLC/PRF5-control PLC/PRF5-ACTL6A

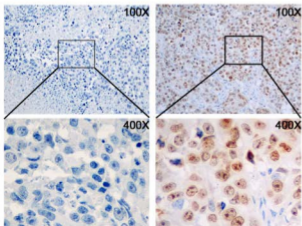

Hep3B-shcontrol Hep3B-shACTL6A

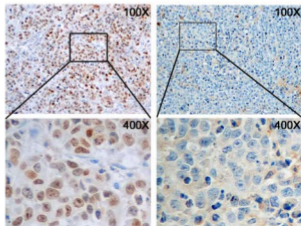

A

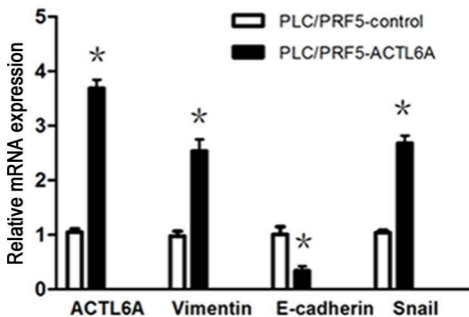

B

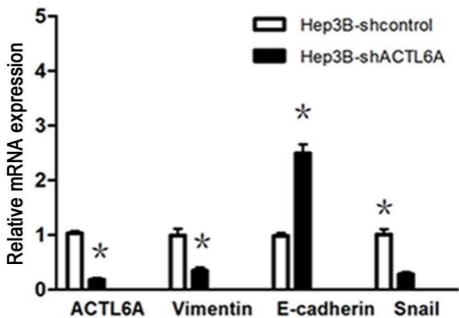

**A**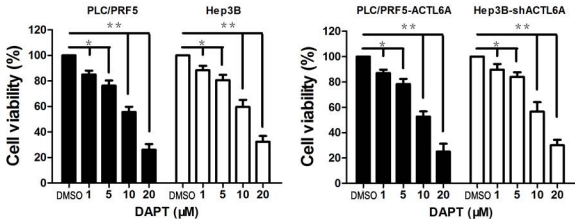**B**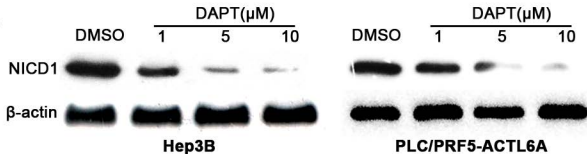

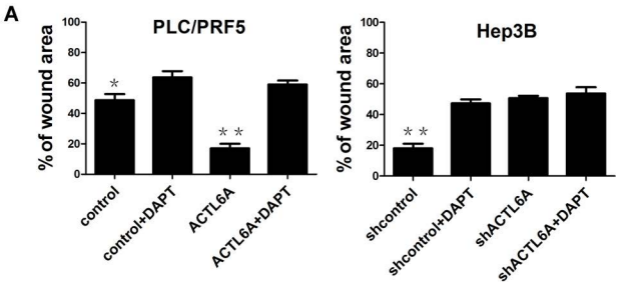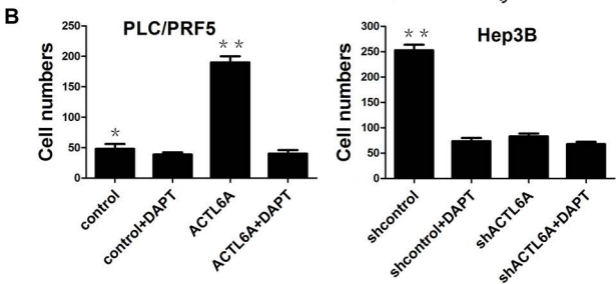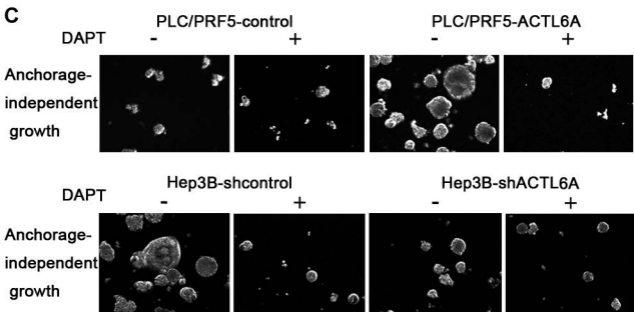

**A**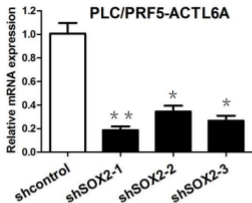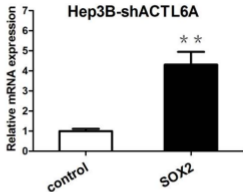**B**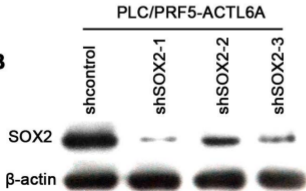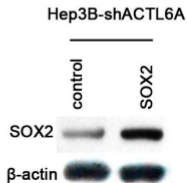



**A**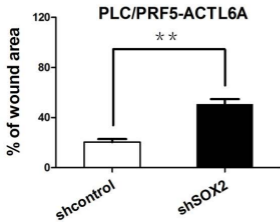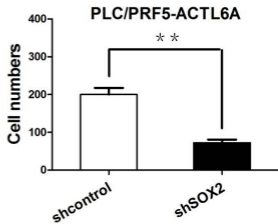**B**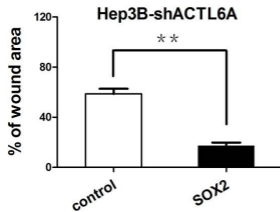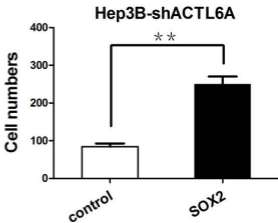

**A**

ACTL6A

SOX2

NICD1

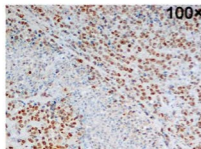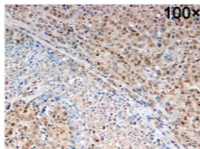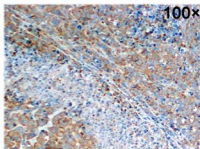**B****Training cohort**

|                    |          | ACTL6A expression |         | <i>P</i> | NICD1 expression |         | <i>P</i> |
|--------------------|----------|-------------------|---------|----------|------------------|---------|----------|
|                    |          | High(73)          | Low(27) | <i>r</i> | High(58)         | Low(42) | <i>r</i> |
| SOX2<br>expression | High(61) | 52                | 9       | <0.01    | 45               | 16      | <0.01    |
|                    | Low(39)  | 21                | 18      | 0.345    | 13               | 26      | 0.400    |

**Validation cohort**

|                    |          | ACTL6A expression |         | <i>P</i> | NICD1 expression |         | <i>P</i> |
|--------------------|----------|-------------------|---------|----------|------------------|---------|----------|
|                    |          | High(43)          | Low(20) | <i>r</i> | High(41)         | Low(22) | <i>r</i> |
| SOX2<br>expression | High(38) | 30                | 8       | 0.024    | 32               | 6       | <0.01    |
|                    | Low(25)  | 13                | 12      | 0.283    | 9                | 16      | 0.495    |

**A**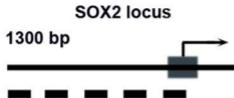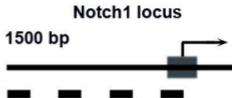**B**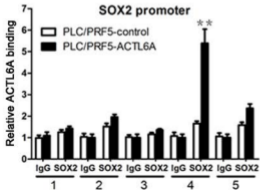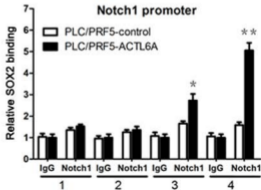

# Tumor

ANLT

Low CK19

High CK19

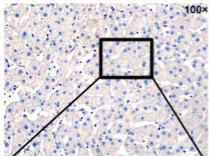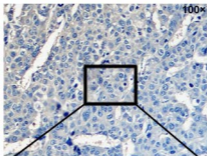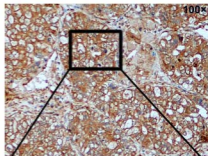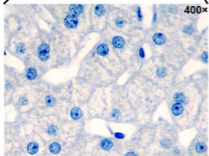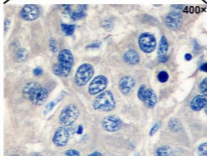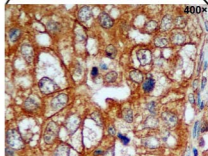

## Supplementary Tables

**Supplementary Table 1. Clinicopathological characteristics of patients in training cohort and validation cohort**

| Clinicopathologic Variables | Counts          |                   | <i>P</i> |
|-----------------------------|-----------------|-------------------|----------|
|                             | Training cohort | Validation cohort |          |
| Gender                      |                 |                   |          |
| Female                      | 31(31.0%)       | 22(34.9%)         | 0.603    |
| Male                        | 69(69.0%)       | 41(65.1%)         |          |
| Age                         |                 |                   |          |
| <50                         | 62(62.0%)       | 37(58.7%)         | 0.677    |
| ≥50                         | 38(38.0%)       | 26(41.3%)         |          |
| AFP(ng/mL)                  |                 |                   |          |
| <20                         | 43(43.0%)       | 25(39.7%)         | 0.676    |
| ≥20                         | 57(57.0%)       | 38(60.3%)         |          |
| HBsAg                       |                 |                   |          |
| Negative                    | 7(7.0%)         | 6(9.5%)           | 0.563    |
| Positive                    | 93(93.0%)       | 57(90.5%)         |          |
| Liver cirrhosis             |                 |                   |          |
| Absence                     | 35(35.0%)       | 21(33.3%)         | 0.827    |
| Presence                    | 65(65.0%)       | 42(66.6%)         |          |
| Liver function              |                 |                   |          |
| Child-Pugh A                | 91(91.0%)       | 56(88.9%)         | 0.659    |
| Child-Pugh B                | 9(9.0%)         | 7(11.1%)          |          |
| Tumor size(cm)              |                 |                   |          |
| ≤5                          | 38(38.0%)       | 19(30.2%)         | 0.307    |
| >5                          | 62(62.0%)       | 44(69.8%)         |          |
| Tumor nodule number         |                 |                   |          |
| Solitary                    | 57(57.0%)       | 30(47.6%)         | 0.242    |
| Multiple(≥2)                | 43(43.0%)       | 33(52.4%)         |          |
| Capsulation formation       |                 |                   |          |
| Presence                    | 42(42.0%)       | 26(41.3%)         | 0.927    |
| Absence                     | 58(58.0%)       | 37(58.7%)         |          |
| Edmondson-Steiner grade     |                 |                   |          |
| I                           | 64(64.0%)       | 39(62.0%)         | 0.787    |
| II                          | 36(36.0%)       | 24(38.0%)         |          |
| Microvascular invasion      |                 |                   |          |
| Absence                     | 34(34.0%)       | 25(39.7%)         | 0.462    |
| Presence                    | 66(66.0%)       | 38(60.3%)         |          |
| BCLC stage                  |                 |                   |          |
| 0&A                         | 28(28.0%)       | 18(28.6%)         | 0.937    |
| B&C                         | 72(72.0%)       | 45(71.4%)         |          |
| TNM stage                   |                 |                   |          |
| Early ( I & II )            | 67(67.0%)       | 35(55.6%)         | 0.142    |
| Late ( III & IV )           | 33(33.0%)       | 28(44.4%)         |          |

Abbreviations: AFP, alpha-fetoprotein; HBsAg, hepatitis B surface antigen; TNM, tumor node metastasis; BCLC, Barcelona Clinic Liver Cancer.

**Supplementary Table 2. Univariate and multivariate Analysis of risk factors associated with overall survival of HCC patients in the validation cohort**

| Variables               | n  | Univariate analysis |                  | Multivariate analysis |              |
|-------------------------|----|---------------------|------------------|-----------------------|--------------|
|                         |    | HR(95% CI)          | P                | HR(95% CI)            | P            |
| Gender                  |    |                     |                  |                       |              |
| Female                  | 22 | 1                   |                  |                       |              |
| Male                    | 41 | 1.157(0.459-1.817)  | 0.568            | NA                    |              |
| Age                     |    |                     |                  |                       |              |
| <50                     | 37 | 1                   |                  |                       |              |
| ≥50                     | 26 | 1.237(0.764-1.404)  | 0.313            | NA                    |              |
| AFP(ng/mL)              |    |                     |                  |                       |              |
| <20                     | 25 | 1                   |                  |                       |              |
| ≥20                     | 38 | 1.341(0.248-2.325)  | 0.221            | NA                    |              |
| HBsAg                   |    |                     |                  |                       |              |
| Negative                | 6  | 1                   |                  |                       |              |
| Positive                | 57 | 1.328(0.819-1.614)  | 0.174            | NA                    |              |
| Liver cirrhosis         |    |                     |                  |                       |              |
| Absence                 | 21 | 1                   |                  | 1                     |              |
| Presence                | 42 | 2.217(1.293-3.127)  | <b>0.003</b>     | 1.873(1.126-2.619)    | <b>0.011</b> |
| Liver function          |    |                     |                  |                       |              |
| Child-Pugh A            | 56 | 1                   |                  |                       |              |
| Child-Pugh B            | 7  | 2.138(1.147-3.975)  | <b>0.018</b>     | NS                    |              |
| Tumor size(cm)          |    |                     |                  |                       |              |
| ≤5                      | 19 | 1                   |                  |                       |              |
| >5                      | 44 | 1.418(0.735-1.866)  | 0.283            | NA                    |              |
| Tumor nodule number     |    |                     |                  |                       |              |
| Solitary                | 30 | 1                   |                  | 1                     |              |
| Multiple(≥2)            | 33 | 3.261(1.434-5.293)  | <b>&lt;0.001</b> | 2.465(1.332-3.646)    | <b>0.008</b> |
| Capsulation formation   |    |                     |                  |                       |              |
| Presence                | 26 | 1                   |                  |                       |              |
| Absence                 | 37 | 1.217(0.614-1.895)  | 0.098            | NS                    |              |
| Edmondson-Steiner grade |    |                     |                  |                       |              |
| &                       | 39 | 1                   |                  |                       |              |
| &                       | 24 | 1.796(1.154-2.563)  | <b>0.023</b>     | NS                    |              |
| Microvascular invasion  |    |                     |                  |                       |              |
| Absence                 | 25 | 1                   |                  | 1                     |              |
| Presence                | 38 | 3.468(1.936-5.458)  | <b>&lt;0.001</b> | 2.815(1.274-4.502)    | <b>0.007</b> |
| BCLC stage              |    |                     |                  |                       |              |
| 0&A                     | 18 | 1                   |                  | 1                     |              |
| B&C                     | 45 | 3.216(1.362-5.074)  | <b>&lt;0.001</b> | 2.194(1.358-3.463)    | <b>0.014</b> |
| TNM stage               |    |                     |                  |                       |              |
| Early ( & )             | 35 | 1                   |                  | 1                     |              |
| Late ( & )              | 28 | 4.271(1.853-6.732)  | <b>&lt;0.001</b> | 3.276(1.548-5.292)    | <b>0.001</b> |
| ACTL6A expression       |    |                     |                  |                       |              |

|      |    |                    |              |  |                    |              |
|------|----|--------------------|--------------|--|--------------------|--------------|
| Low  | 20 | 1                  |              |  | 1                  |              |
| High | 43 | 2.318(1.414-3.329) | <b>0.008</b> |  | 2.596(1.641-3.692) | <b>0.011</b> |

**Supplementary Table 3. Univariate and multivariate Analysis of risk factors associated with disease-free survival of HCC patients in the validation cohort**

| Variables               | n  | Univariate analysis |                  | Multivariate analysis |              |
|-------------------------|----|---------------------|------------------|-----------------------|--------------|
|                         |    | HR(95% CI)          | P                | HR(95% CI)            | P            |
| Gender                  |    |                     |                  |                       |              |
| Female                  | 22 | 1                   |                  |                       |              |
| Male                    | 41 | 1.036(0.543-1.417)  | 0.782            | NA                    |              |
| Age                     |    |                     |                  |                       |              |
| <50                     | 37 | 1                   |                  |                       |              |
| ≥50                     | 26 | 1.132(0.652-1.707)  | 0.541            | NA                    |              |
| AFP(ng/mL)              |    |                     |                  |                       |              |
| <20                     | 25 | 1                   |                  |                       |              |
| ≥20                     | 38 | 1.915(1.077-3.314)  | <b>0.022</b>     | NS                    |              |
| HBsAg                   |    |                     |                  |                       |              |
| Negative                | 6  | 1                   |                  |                       |              |
| Positive                | 57 | 1.725(0.745-3.411)  | 0.119            | NA                    |              |
| Liver cirrhosis         |    |                     |                  |                       |              |
| Absence                 | 21 | 1                   |                  |                       |              |
| Presence                | 42 | 2.436(1.392-3.641)  | <b>0.002</b>     | NS                    |              |
| Liver function          |    |                     |                  |                       |              |
| Child-Pugh A            | 56 | 1                   |                  |                       |              |
| Child-Pugh B            | 7  | 1.638(0.854-2.523)  | 0.173            | NA                    |              |
| Tumor size(cm)          |    |                     |                  |                       |              |
| ≤5                      | 19 | 1                   |                  |                       |              |
| >5                      | 44 | 1.325(0.619-1.736)  | 0.217            | NA                    |              |
| Tumor nodule number     |    |                     |                  |                       |              |
| Solitary                | 30 | 1                   |                  | 1                     |              |
| Multiple(≥2)            | 33 | 2.814(1.658-4.731)  | <b>0.001</b>     | 2.172(1.132-3.374)    | <b>0.008</b> |
| Capsulation formation   |    |                     |                  |                       |              |
| Presence                | 26 | 1                   |                  |                       |              |
| Absence                 | 37 | 1.754(1.193-2.618)  | <b>0.038</b>     | NS                    |              |
| Edmondson-Steiner grade |    |                     |                  |                       |              |
| &                       | 39 | 1                   |                  |                       |              |
| &                       | 24 | 1.934(1.211-2.754)  | <b>0.006</b>     | NS                    |              |
| Microvascular invasion  |    |                     |                  |                       |              |
| Absence                 | 25 | 1                   |                  | 1                     |              |
| Presence                | 38 | 3.945(2.144-5.912)  | <b>&lt;0.001</b> | 3.183(1.765-4.682)    | <b>0.015</b> |
| BCLC stage              |    |                     |                  |                       |              |
| 0&A                     | 18 | 1                   |                  | 1                     |              |
| B&C                     | 45 | 2.923(1.721-5.392)  | <b>0.001</b>     | 2.468(1.493-4.572)    | <b>0.003</b> |

|                   |    |                    |                  |                    |              |
|-------------------|----|--------------------|------------------|--------------------|--------------|
| TNM stage         |    |                    |                  |                    |              |
| Early ( & )       | 35 | 1                  |                  | 1                  |              |
| Late ( & )        | 28 | 4.173(1.925-6.735) | <b>&lt;0.001</b> | 2.852(1.417-4.275) | <b>0.001</b> |
| ACTL6A expression |    |                    |                  |                    |              |
| Low               | 20 | 1                  |                  | 1                  |              |
| High              | 43 | 2.693(1.417-4.027) | <b>0.004</b>     | 2.118(1.342-3.147) | <b>0.009</b> |

**Supplementary Table 4. The sequences of PCR primers and RNAi used in this study**

| Target gene | Application   | Sequence                   |
|-------------|---------------|----------------------------|
| ACTL6A      | RT-PCR        | F: GGTCGTTCTACTGGGCTGATT   |
|             |               | R: AGCAAGAGGGGATTTACAAT    |
| ACTL6A      | real-time PCR | F: CCAGGTCTCTATGGCAGTGTA   |
|             |               | R: CGTAAGGTGACAAAAGGAAGGTA |
| GAPDH       | RT-PCR        | F: AGAAGGCTGGGGCTCATTTG    |
|             |               | R: AGGGGCCATCCACAGTCTTC    |
| GAPDH       | real-time PCR | F: GTCTCCTCTGACTTCAACAGCG  |
|             |               | R: ACCACCCTGTTGCTGTAGCCAA  |
| Notch1      | real-time PCR | F: GGTGAACTGCTCTGAGGAGATC  |
|             |               | R: GGATTGCAGTCGTCCACGTTGA  |
| Notch2      | real-time PCR | F: GTGCCTATGTCCATCTGGATGG  |
|             |               | R: AGACACCTGAGTGCTGGCACAA  |
| Notch3      | real-time PCR | F: TACTGGTAGCCACTGTGAGCAG  |
|             |               | R: CAGTTATCACCATTGTAGCCAGG |
| Notch4      | real-time PCR | F: TTCCACTGTCCTCCTGCCAGAA  |
|             |               | R: TGGCACAGGCTGCCTTGAATC   |
| Jagged1     | real-time PCR | F: CAACGGCGAGTCCTTTAC      |
|             |               | R: CTGGCATTTCATTGATGTTTA   |
| SOX2        | real-time PCR | F: CGCAGACCTACATGAACG      |



|            |               |                            |
|------------|---------------|----------------------------|
|            |               | R: CCCTGGAGTGGGAGGAA       |
| Hes1       | real-time PCR | F: GGTGGCTGCTACCCCAGCCA    |
|            |               | R: GGTAGGTCATGGCGTTGATC    |
| E-cadherin | real-time PCR | F: GCCTCCTGAAAAGAGAGTGGAAG |
|            |               | R: TGGCAGTGTCTCTCCAAATCCG  |
| Vimentin   | real-time PCR | F: AGGCAAAGCAGGAGTCCACTGA  |
|            |               | R: ATCTGGCGTTCCAGGGACTCAT  |
| Snail      | real-time PCR | F: TGCCCTCAAGATGCACATCCGA  |
|            |               | R: GGGACAGGAGAAGGGCTTCTC   |

**Supplementary Table 5. List of the Antibodies used in this study.**

| Antibody name  | Source                  |
|----------------|-------------------------|
| ACTL6A         | Santa Cruz (sc-137062)  |
| $\beta$ -actin | Sigma Aldrich (A5316)   |
| E-cadherin     | Santa Cruz (sc-7870)    |
| Vimentin       | Santa Cruz (sc-7557)    |
| Snail          | Abcam (ab85936)         |
| Jagged1        | Cell signaling (2620)   |
| Notch1         | Santa Cruz (sc-23299)   |
| RBP-Jk         | Santa Cruz (sc-28713)   |
| Hes1           | Santa Cruz (sc-166410)  |
| SOX2           | Abcam (ab92494)         |
| Cytokeratin 19 | Proteintech(60187-1-Ig) |

**Supplementary Table 6. List of the reagents used in this study.**

| Reagent name                                                                          | Source                              |
|---------------------------------------------------------------------------------------|-------------------------------------|
| Donkey anti-Mouse IgG (H+L) Cross Adsorbed Secondary Antibody, DyLight 594 conjugate  | ThermoFisher Scientific (SA5-10168) |
| Donkey anti-Rabbit IgG (H+L) Cross Adsorbed Secondary Antibody, DyLight 488 conjugate | ThermoFisher Scientific (SA5-10038) |
| Donkey anti-Goat IgG (H+L) Cross Adsorbed Secondary Antibody, DyLight 650 conjugate   | ThermoFisher Scientific (SA5-10089) |
| Goat anti-Rabbit IgG (H+L) Secondary Antibody, DyLight 594 conjugate                  | ThermoFisher Scientific (#35560)    |
| Donkey anti-Goat IgG (H+L) Cross Adsorbed Secondary Antibody, DyLight 594 conjugate   | ThermoFisher Scientific (SA5-10088) |
| DAPT (GSI-IX)                                                                         | Selleck (S2215)                     |
| CellTiter 96® AQueous One Solution Cell Proliferation Assay                           | Promega (G3582)                     |
| Mitomycin C                                                                           | Roche (M8170)                       |
| EpiQuik™ Chromatin Immunoprecipitation Kit                                            | Epigentek (P-2002)                  |
| Polymer HRP Detection System                                                          | ZSGB-BIO (PV-9000, PV-9003)         |
| Signal Finder Cancer 10-Pathway Reporter Array                                        | QIAGEN (CCA-101L)                   |

**Supplementary Table 7. The primers used for CHIP-qPCR in this study**

| CHIP-qPCR region | Forward primer        | Reverse primer         |
|------------------|-----------------------|------------------------|
| SOX2-1           | CCTCCATACAGTGCCGTGGGA | GTAAGAAGGGTTTCGGTCGTG  |
| SOX2-2           | TTGCTACGGTTGAATGAAGAC | TTCCACGTAACCTTGCTCTGTT |
| SOX2-3           | CTTCTAGTCGGGACTGTGAGA | GGTGCAGGGTACTTAAATGAG  |
| SOX2-4           | GATGAGCGGGAGACAATGAC  | CAGCACTAAGACTACGTGGGT  |
| SOX2-5           | CCCGTCACATGGATGGTTGTC | CCGCCGCCGATGATTGTTATT  |
| Notch1-1         | CCTCCCAGCCTTTCGGTCTCC | CCCTGTGCCAAGCCTGGTTAA  |
| Notch1-2         | CGCCTTCTGCCATCGCACTCA | CGTGCTCCTTCCGGCTGATTT  |
| Notch1-3         | AGATCCGCCCGACCCGTTTGT | CGTGATTGCCCGAGCACTTGA  |
| Notch1-4         | ACGGTGCCCGAGGAGCGTGTC | CACTTGACCGCGAGGGATGGG  |

**Supplementary Table 8. The sequences of RNAi and cDNA clone used in this study**

| Name                                    | Sequence                                                                                                                                                                                                                                                                                                                                                                                                                                                                                                                                                                                                                                                                                                                                                                                                                                                                                                                                                                                                                                                                                                         |
|-----------------------------------------|------------------------------------------------------------------------------------------------------------------------------------------------------------------------------------------------------------------------------------------------------------------------------------------------------------------------------------------------------------------------------------------------------------------------------------------------------------------------------------------------------------------------------------------------------------------------------------------------------------------------------------------------------------------------------------------------------------------------------------------------------------------------------------------------------------------------------------------------------------------------------------------------------------------------------------------------------------------------------------------------------------------------------------------------------------------------------------------------------------------|
| ACTL6A-RNAi-1                           | TCCAAGTATGCGGTTGAAA                                                                                                                                                                                                                                                                                                                                                                                                                                                                                                                                                                                                                                                                                                                                                                                                                                                                                                                                                                                                                                                                                              |
| ACTL6A-RNAi-2                           | GTA CTTCAAGTGTCAGATT                                                                                                                                                                                                                                                                                                                                                                                                                                                                                                                                                                                                                                                                                                                                                                                                                                                                                                                                                                                                                                                                                             |
| ACTL6A-RNAi-3                           | GGGATAGTTTCCAAGCTAT                                                                                                                                                                                                                                                                                                                                                                                                                                                                                                                                                                                                                                                                                                                                                                                                                                                                                                                                                                                                                                                                                              |
| SOX2-RNAi-1                             | GTTCTAGTGGTACGGTAGG                                                                                                                                                                                                                                                                                                                                                                                                                                                                                                                                                                                                                                                                                                                                                                                                                                                                                                                                                                                                                                                                                              |
| SOX2-RNAi-2                             | AGTTCTAGTGGTACGGTAG                                                                                                                                                                                                                                                                                                                                                                                                                                                                                                                                                                                                                                                                                                                                                                                                                                                                                                                                                                                                                                                                                              |
| SOX2-RNAi-3                             | TCAGTCTGCCGAGAATCCA                                                                                                                                                                                                                                                                                                                                                                                                                                                                                                                                                                                                                                                                                                                                                                                                                                                                                                                                                                                                                                                                                              |
| ORF Nucleotide<br>Sequence of<br>ACTL6A | CGAAGCTTGGGCTGCAGGTCGACTCTAGAGGATCCC<br>CGGGTACCGGTCGCCACCATGAGCGGCGGCGTGTAC<br>GGGGGAGATGAAGTTGGAGCCCTTGTTTTGACATTG<br>GATCCTATACTGTGAGAGCTGGTTATGCTGGTGAGGA<br>CTGCCCAAGGTGGATTTTCTACAGCTATTGGTATGG<br>TGGTAGAAAGAGATGACGGAAGCACATTAATGGAAATA<br>GATGGCGATAAAGGCAAACAAGGCGGTCCCACCTACT<br>ACATAGATACTAATGCTCTGCGTGTTCCGAGGGAGAAT<br>ATGGAGGCCATTTACCTCTAAAAAATGGGATGGTTGA<br>AGACTGGGATAGTTTCCAAGCTATTTTGGATCATACT<br>ACAAAATGCATGTCAAATCAGAAGCCAGTCTCCATCCT<br>GTTCTCATGTCAGAGGCACCGTGGAATACTAGAGCAA<br>AGAGAGAGAACTGACAGAGTTAATGTTTGAACACTA<br>CAACATCCCTGCCCTTCTCCTTTGCAAACTGCAGTTT<br>TGACAGCATTTGCTAATGGTCGTTCTACTGGGCTGATT<br>TTGGACAGTGGAGCCACTCATACCACTGCAATTCCAG<br>TCCACGATGGCTATGTCCTTCAACAAGGCATTGTGAAA<br>TCCCCTCTTGCTGGAGACTTTATTACTATGCAGTGCAG<br>AGA ACTCTTCCAAGAAATGAATATTGAATTGGTTCCTC<br>CATATATGATTGCATCAAAGAAGCTGTTTCGTGAAGGA<br>TCTCCAGCAA ACTGGAAAAGAAAAGAGAAGTTGCCTC<br>AGGTTACGAGGTCTTGGCACAATTATATGTGTAATTGT<br>GTTATCCAGGATTTTCAAGCTTCGGTACTTCAAGTGTC<br>AGATTCAACTTATGATGAACAAGTGGCTGCACAGATGC<br>CAACTGTT CATTATGAATTC CCAATGGCTACAATTGT<br>GATTTTGGTGCAGAGCGGCTAAAGATTCCAGAAGGAT |

|                                                            |                                                                                                                                                                                                                                                                                                                                                                                                                                                                                                                                                                                                                                                                                                                                                                                                                                                                                                                                                                                                                                                                                                                                                                                                                                                                                                            |
|------------------------------------------------------------|------------------------------------------------------------------------------------------------------------------------------------------------------------------------------------------------------------------------------------------------------------------------------------------------------------------------------------------------------------------------------------------------------------------------------------------------------------------------------------------------------------------------------------------------------------------------------------------------------------------------------------------------------------------------------------------------------------------------------------------------------------------------------------------------------------------------------------------------------------------------------------------------------------------------------------------------------------------------------------------------------------------------------------------------------------------------------------------------------------------------------------------------------------------------------------------------------------------------------------------------------------------------------------------------------------|
|                                                            | <p>TATTTGACCCTTCCAATGTAAAGGGGTTATCAGGAAAC<br/> ACAATGTTAGGAGTCAGTCATGTTGTCACCACAAGTGT<br/> TGGGATGTGTGATATTGACATCAGACCAGGTCTCTATG<br/> GCAGTGTAAATAGTGGCAGGAGGAAACACACTAATACA<br/> GAGTTTTACTGACAGGTTGAATAGAGAGCTGTCTCAG<br/> AAAACCTCCAAGTATGCGGTTGAAATTGATTGCAAA<br/> TAATACAACAGTGGAACGGAGGTTTAGCTCATGGATTG<br/> GCGGCTCCATTCTAGCCTCTTTGGGTACCTTTCAACA<br/> GATGTGGATTTCCAAGCAAGAATATGAAGAAGGAGGG<br/> AAGCAGTGTGTAGAAAGAAAATGCCCTGGTATGGACT<br/> ACAAGGATGACGATGACAAGGATTACAAAGACGACGA<br/> TGATAAGGACTATAAGGATGATGACGACAAATGAGCTA<br/> GCCTGTGGAA</p>                                                                                                                                                                                                                                                                                                                                                                                                                                                                                                                                                                                                                                                                                                                                                 |
| <p>ORF Nucleotide<br/><br/> Sequence of<br/><br/> SOX2</p> | <p>TTTTGTAATACGACTCACTATAGGGCGGCCGGAATTC<br/> GTCGACTGGATCCGGTACCGAGGAGATCTGCCGCCG<br/> CGATCGCCATGTACAACATGATGGAGACGGAGCTGAA<br/> GCCGCCGGGCCCGCAGCAAACCTTCGGGGGGCGGGCG<br/> GCGGCAACTCCACCGCGGCGGCGGCCGGCGGCAAC<br/> CAGAAAACAGCCCGGACCGCGTCAAGCGGCCCATG<br/> AATGCCTTCATGGTGTGGTCCCGCGGGCAGCGGCGC<br/> AAGATGGCCCAGGAGAACCCCAAGATGCACAACTCG<br/> GAGATCAGCAAGCGCCTGGGCGCCGAGTGGAACCTT<br/> TTGTCGGAGACGGAGAAGCGGCCGTTTCATCGACGAG<br/> GCTAAGCGGCTGCGAGCGCTGCACATGAAGGAGCAC<br/> CCGATTATAAATACCGGCCCCCGCGGAAAACCAAGA<br/> CGCTCATGAAGAAGGATAAGTACACGCTGCCCGGCG<br/> GGCTGCTGGCCCCCGGCGGCAATAGCATGGCGAGCG<br/> GGGTCGGGGTGGGCGCCGGCCTGGGCGCGGGCGT<br/> GAACCAGCGCATGGACAGTTACGCGCACATGAACGG<br/> CTGGAGCAACGGCAGCTACAGCATGATGCAGGACCA<br/> GCTGGGCTACCCGCAGCACCCGGGCTCAATGCGCA<br/> CGGCGCAGCGCAGATGCAGCCCATGCACCGCTACGA<br/> CGTGAGCGCCCTGCAGTACAACCTCCATGACCAGCTC<br/> GCAGACCTACATGAACGGCTCGCCACCTACAGCATG<br/> TCCTACTCGCAGCAGGGCACCCCTGGCATGGCTCTT<br/> GGCTCCATGGGTTCCGGTGGTCAAGTCCGAGGCCAGC<br/> TCCAGCCCCCTGTGGTTACCTCTTCCCTCCACTCCA<br/> GGGCGCCCTGCCAGGCCGGGGACCTCCGGGACATG<br/> ATCAGCATGTATCTCCCCGGCGCCGAGGTGCCGGAA<br/> CCCGCCGCCCCAGCAGACTTCACATGTCCAGCAC<br/> TACCAGAGCGGCCCGGTGCCCGGCACGGCCATTAAC<br/> GGCACACTGCCCTCTCACACATGACGCGTACGCGG<br/> CCGCTCGAGCAGAACTCATCTCAGAAGAGGATCTGG</p> |

|                                                     |
|-----------------------------------------------------|
| CAGCAAATGATATCCTGGATTACAAGGATGACGACGAT<br>AAGGTTTAA |
|-----------------------------------------------------|

**Supplementary Table 9. Correlation between CK19 expression with clinicopathological characteristics of HCC and ACTL6A expression in training cohort.**

| Clinicopathologic Variables | CK19 Expression |              |              | <i>P</i> |
|-----------------------------|-----------------|--------------|--------------|----------|
|                             | n               | Positive(17) | Negative(83) |          |
| <b>Gender</b>               |                 |              |              |          |
| Female                      | 31              | 5            | 26           | 0.877    |
| Male                        | 69              | 12           | 57           |          |
| <b>Age</b>                  |                 |              |              |          |
| <50                         | 62              | 10           | 52           | 0.767    |
| ≥50                         | 38              | 7            | 31           |          |
| <b>AFP(ng/mL)</b>           |                 |              |              |          |
| <20                         | 43              | 9            | 34           | 0.364    |
| ≥20                         | 57              | 8            | 49           |          |
| <b>HBsAg</b>                |                 |              |              |          |
| Negative                    | 7               | 3            | 4            | 0.172    |
| Positive                    | 93              | 14           | 79           |          |
| <b>Liver cirrhosis</b>      |                 |              |              |          |
| Absence                     | 35              | 6            | 29           | 0.978    |
| Presence                    | 65              | 11           | 54           |          |
| <b>Liver function</b>       |                 |              |              |          |
| Child-Pugh A                | 91              | 15           | 76           | 0.662    |
| Child-Pugh B                | 9               | 2            | 7            |          |
| <b>Tumor size(cm)</b>       |                 |              |              |          |
| ≤5                          | 38              | 6            | 32           | 0.801    |
| >5                          | 62              | 11           | 51           |          |
| <b>Tumor nodule number</b>  |                 |              |              |          |
| Solitary                    | 57              | 4            | 53           |          |

|                        |    |    |    |                   |
|------------------------|----|----|----|-------------------|
| Multiple( $\geq 2$ )   | 43 | 13 | 30 | <b>0.001</b>      |
| Capsulation formation  |    |    |    |                   |
| Presence               | 42 | 6  | 36 |                   |
| Absence                | 58 | 11 | 47 | 0.539             |
| Edmondson-Steiner      |    |    |    |                   |
| &                      | 64 | 5  | 59 |                   |
| &                      | 36 | 12 | 24 | <b>&lt; 0.001</b> |
| Microvascular invasion |    |    |    |                   |
| Absence                | 34 | 4  | 30 |                   |
| Presence               | 66 | 13 | 53 | 0.200             |
| BCLC stage             |    |    |    |                   |
| 0&A                    | 28 | 5  | 23 |                   |
| B&C                    | 72 | 12 | 60 | 0.887             |
| TNM stage              |    |    |    |                   |
| Early ( & )            | 67 | 10 | 57 |                   |
| Late ( & )             | 33 | 7  | 26 | 0.431             |
| ACTL6A expression      |    |    |    |                   |
| High                   | 73 | 11 | 62 |                   |
| Low                    | 27 | 6  | 21 | 0.398             |
